# Supplementary material for: Synthesis of macrocyclic analogues of the neuroprotective agent glycyl-l-prolyl-l-glutamic acid (GPE)
Source: Royal Society of Chemistry journal article supplement (doi:10.1039/b605293b), 2006-01-01
Supplement: b605293b.pdf [file b605293b.pdf]

## ELECTRONIC SUPPLEMENTARY MATERIAL

### Synthesis of Macrocyclic Analogues of the Neuroprotective Agent

#### Glycyl-L-Prolyl-L-Glutamic Acid (GPE)

Paul W. R. Harris and Margaret A. Brimble\*

*Department of Chemistry, University of Auckland, 23 Symonds St., Auckland, New Zealand.*

FAX: +64 9 3737422; EMAIL: m.brimble@auckland.ac.nz

### Experimental

#### General

#### General

All reagents were used as supplied. Solvents were purified by standard methods. Analytical thin layer chromatography (TLC) was carried out on 0.20 mm pre-coated silica gel plates (ALUGRAM<sup>®</sup> SIL G/UV<sub>254</sub>). Products were visualized by UV fluorescence and heating of plates dipped in anisaldehyde in ethanolic sulphuric acid or alkaline potassium permanganate solution. Flash chromatography was performed using Scharlau 60 (40-60  $\mu\text{m}$  mesh) silica gel. Melting points in degrees Celsius ( $^{\circ}\text{C}$ ) were measured on an Electrothermal<sup>®</sup> melting point apparatus and are uncorrected. Optical rotations were measured at the sodium D line (589 nm), at 20  $^{\circ}\text{C}$ , with a Perkin Elmer 341 polarimeter using a 1 dm path length cell and are given in units of  $10^{-1}\text{degcm}^2\text{g}^{-1}$ . IR spectra were recorded on a Perkin Elmer Spectrum One FT-IR spectrometer and the samples were prepared as thin films between sodium chloride plates. Nuclear Magnetic Resonance (NMR) spectra were recorded on a Bruker AVANCE DRX400 ( $^1\text{H}$ , 400 MHz;  $^{13}\text{C}$ , 100 MHz), a Bruker AVANCE 300 ( $^1\text{H}$ , 300 MHz;  $^{13}\text{C}$ , 75 MHz) or a Bruker AC200 ( $^1\text{H}$ , 200 MHz;  $^{13}\text{C}$ , 50 MHz) spectrometer at 298 K. For  $^1\text{H}$  NMR data, chemical shifts are described in parts per million (ppm) relative to tetramethylsilane ( $\delta$  0.00), DOH ( $\delta$  4.75), CHD<sub>2</sub>OD ( $\delta$  3.30) or CHD<sub>2</sub>S(O)CD<sub>3</sub> ( $\delta$  2.50) and are reported consecutively as position ( $\delta_{\text{H}}$ ), relative integral, multiplicity (s = singlet, d = doublet, t = triplet, q = quartet, p = pentet, q = quintet, s = sextet, dd = doublet of doublets, m = multiplet, and where br = broad), coupling constant ( $J/\text{Hz}$ ) and assignment. For  $^{13}\text{C}$  NMR data, chemical shifts (ppm) are

referenced internally to  $\text{CDCl}_3$  ( $\delta$  77.0),  $\text{CD}_3\text{OD}$  ( $\delta$  49.1) and  $(\text{CD}_3)_2\text{S(O)}$  ( $\delta$  39.4) or externally to 3-(trimethylsilyl)-1-propanesulfonic acid sodium salt (DSS) and are reported consecutively as position ( $\delta_{\text{C}}$ ), degree of hybridisation and assignment. Assignments were aided by DEPT135, COSY, NOESY, HSQC and HMBC experiments. When two sets of peaks arise in the NMR spectra due to *cis/trans* isomerisation about the glycine-proline amide bond, the chemical shift for the minor *cis* conformer is asterisked (\*). Mass spectra were recorded on a VG-70SE mass spectrometer (EI, CI and FAB). High-resolution mass spectra were recorded at a nominal resolution of 5000. Analytical HPLC were performed on a Waters 600 system with a 2487 dual  $\lambda$  absorbance detector using an Phenomenex Jupiter  $\text{C}_{18}$  (150  $\times$  4.6 mm; 5  $\mu\text{m}$ ) 90% A:10% B to 100% B over 35 mins at 1 mL/min (A = water/0.05% TFA, B = MeCN). Semi-preparative HPLC was performed using a Waters Xterra  $\text{C}_{18}$  (300  $\times$  19 mm; 10  $\mu\text{m}$ ) starting at 90% A: 10% B to 100% B at 13 mL/min (A = water/0.05% TFA, B = MeCN) and adjusting the gradient as required. Fractions containing the purified compound were combined and lyophilised.

### **(S)-Ethyl *N*-*tert*-butoxycarbonylpyroglutamate<sup>1i</sup> 16**

(S)-Pyroglutamic acid **15** (3.0 g, 15.5 mmol) was suspended in ethanol (40  $\text{cm}^3$ ) and cooled to 0  $^\circ\text{C}$  under a nitrogen atmosphere. Thionyl chloride (2.03 g, 17.0 mmol) was added dropwise and the solution was allowed to warm to room temperature overnight. The solution was cooled to 0  $^\circ\text{C}$ , neutralised with saturated aqueous sodium hydrogen carbonate and extracted with chloroform. The combined organic layers were pooled, dried ( $\text{Na}_2\text{SO}_4$ ), filtered and the solvent removed to give the crude ester<sup>2</sup> (2.53 g, 104%) that was used without further purification. To a solution of the ester (2.53 g) and dimethylaminopyridine (0.19 g, 1.55 mmol) in acetonitrile (30  $\text{cm}^3$ ) was added di-*tert*-butyl dicarbonate (3.71 g, 17.05 mmol). The resultant solution was stirred at room temperature for 18 h, concentrated *in vacuo* and purified by chromatography ( $\text{SiO}_2$ , 3:1, 2:1, hexanes-ethyl acetate) to give a yellow solid that was recrystallised from hexanes to afford carbamate **16** (3.35 g, 85%, in 2 steps) as a colourless solid: mp 53-54  $^\circ\text{C}$  (lit.<sup>i</sup> 53-54  $^\circ\text{C}$ );  $[\alpha]_{\text{D}}$  -39.8 (*c* 0.5 in MeOH) [lit.<sup>i</sup> -46.3 (*c* 1.5 in MeOH)];  $\delta_{\text{H}}$  (300 MHz;  $\text{CDCl}_3$ ;  $\text{Me}_4\text{Si}$ ) 1.26 (3H, t, *J* 7.1,  $\text{OCH}_2\text{CH}_3$ ), 1.48 [9H, s,  $\text{C}(\text{CH}_3)_3$ ], 1.96-2.06 (1H, m), 2.24-2.68 (3H, m), 4.22 (2H, q, *J* 7.2,  $\text{OCH}_2\text{CH}_3$ ), and 4.58 (1H, dd, *J* 9.4 and 3.0, 5-H);  $\delta_{\text{C}}$  (75 MHz;  $\text{CDCl}_3$ ) 14.2 ( $\text{CH}_3$ ,  $\text{OCH}_2\text{CH}_3$ ), 21.5 ( $\text{CH}_2$ , 4-C), 27.9 [ $\text{CH}_3$ ,  $\text{C}(\text{CH}_3)_3$ ], 31.2 ( $\text{CH}_2$ , 3-C), 58.9 (CH, 5-C),

61.7 (CH<sub>2</sub>, OCH<sub>2</sub>CH<sub>3</sub>), 83.5 [quat., C(CH<sub>3</sub>)<sub>3</sub>], 149.3 (quat., NCO<sub>2</sub>), 171.3 (quat., 5-CO) and 173.2 (quat., 2-C).

### ***N*-tert-Butoxycarbonyl-(*S*)-allylglycine-5-allyl-L-proline ethyl ester **10****

To a stirred solution of carbamate **16** (1.0 g, 3.89 mmol) in dry tetrahydrofuran (40 cm<sup>3</sup>) was added a 1 mol L<sup>-1</sup> tetrahydrofuran solution of lithium triethylborohydride (4.66 cm<sup>3</sup>, 4.66 mmol) at -78 °C under an atmosphere of nitrogen. The solution was stirred for 1 h, saturated aqueous sodium hydrogen carbonate (10 cm<sup>3</sup>) was added and the cooling bath removed. The temperature was allowed to reach 0 °C then 30% aqueous hydrogen peroxide (35 drops) was added and stirring was continued at 0 °C for 50 min. The aqueous layer was extracted with ether, the combined organic extracts were washed with brine, dried (MgSO<sub>4</sub>), filtered and the solvent removed to give the crude mixture of aminols (1.30 g). The crude aminol mixture (0.363 g, *ca.* 1.40 mmol) was dissolved in dry dichloromethane (10 cm<sup>3</sup>), allyltributylstannane (0.87 cm<sup>3</sup>, 2.80 mmol) was added and the solution cooled to -78 °C under a nitrogen atmosphere. Boron trifluoride etherate (0.36 cm<sup>3</sup>, 2.80 mmol) was added dropwise, and the solution was stirred at -78 °C for 2 h, then saturated aqueous sodium hydrogen carbonate (10 cm<sup>3</sup>) was added and the reaction mixture warmed to room temperature. The aqueous layer was extracted with dichloromethane and the pooled organic extracts dried (Na<sub>2</sub>SO<sub>4</sub>) and filtered. Removal of the solvent *in vacuo* afforded an oil (1.28 g) that was purified by chromatography (SiO<sub>2</sub>, 16:1, 10:1, 8:1, 6:1, 4:1, 3:1, hexanes-ethyl acetate) to afford alkene **17**<sup>ii</sup> [0.217 g, 54% over 2 steps] as a colourless oil. Alkene **17** was shown to be a 66:33 mixture of C(1)/C(5) *cis:trans* isomers together with minor component(s). Due to the complex nature of the NMR spectrum this compound was not characterized and used directly in the next step.

Trifluoroacetic acid (2 cm<sup>3</sup>) was added to a solution of alkenes **17** (0.22 g, 0.77 mmol) in dichloromethane (4 cm<sup>3</sup>) and the solution was stirred at room temperature for 4 h, then the volatiles removed *in vacuo* to yield the *trifluoroacetate salts* **12** as an oil. Half of this material (0.383 mmol) was dissolved in dichloromethane (7 cm<sup>3</sup>), *N*-tert-butoxycarbonyl-(*S*)-allylglycine **14**<sup>iii,iv</sup> (0.07 g, 0.32 mmol) and triethylamine (0.042 g, 0.42 mmol) were added and the solution cooled to 0 °C. *N, N'*-Dicyclohexylcarbodiimide (0.065 g, 0.316 mmol) was added, the mixture stirred overnight, then filtered through Celite™ to remove dicyclohexyl urea. The filtrate was subsequently washed with saturated aqueous sodium hydrogen carbonate, 2 M aqueous hydrochloric acid, dried (MgSO<sub>4</sub>), filtered and the solvent removed to yield an oil

(0.113 g) which was purified by chromatography (SiO<sub>2</sub>, 4:1, hexane-ethyl acetate) to afford diene **10** (0.064 g, 55%, 2 steps) as a colourless oil. Diene **10** was an inseparable mixture of diastereomers [C2/C5, *cis/trans*, 77:23]:  $\delta_{\text{H}}$  (400 MHz; CDCl<sub>3</sub>; Me<sub>4</sub>Si) 1.21-1.26 (3H, m, OCH<sub>2</sub>CH<sub>3</sub>), 1.37 [6.93H, s, C(CH<sub>3</sub>)<sub>3</sub>], 1.41 [2.07H, s, C(CH<sub>3</sub>)<sub>3</sub>], 1.64-1.97 (4H, m, Pro $\beta$ -H<sub>2</sub> and Pro $\gamma$ -H<sub>2</sub>), 2.0-2.52 [3.77H, m, 2 x CH<sub>2</sub>(allyl)], 2.75-2.95 [0.23H, m, CH<sub>A</sub>CH<sub>B</sub>(allyl)], 4.07-4.21 (2.23H, m, OCH<sub>2</sub>CH<sub>3</sub> and Pro $\alpha$ -H\*), 4.32-4.48 (2.77H, Pro $\delta$ -H, Gly $\alpha$ -H and Pro $\alpha$ -H), 4.97-5.26 (5H, m, 2 x =CH<sub>2</sub>, N-H) and 5.64-5.84 [2H, m, 2 x C(H)=CH<sub>2</sub>];  $\delta_{\text{C}}$  (100 MHz; CDCl<sub>3</sub>) 13.9\* (CH<sub>3</sub>, OCH<sub>2</sub>CH<sub>3</sub>), 14.1 (CH<sub>3</sub>, OCH<sub>2</sub>CH<sub>3</sub>), 26.8 (CH<sub>2</sub>, Pro $\beta$ -C), 28.3 [CH<sub>3</sub>, C(CH<sub>3</sub>)<sub>3</sub>], 29.0\* (CH<sub>2</sub>, Pro $\gamma$ -C), 29.5 (CH<sub>2</sub>, Pro $\gamma$ -C), 37.7\* [CH<sub>2</sub>, CH<sub>2</sub>(allyl)Pro], 37.8 [CH<sub>2</sub>, CH<sub>2</sub>(allyl)Gly], 38.4\* [CH<sub>2</sub>, CH<sub>2</sub>(allyl)Gly], 39.4\* [CH<sub>2</sub>, CH<sub>2</sub>(allyl)Pro], 50.9 (CH, Gly $\alpha$ -C), 51.9\* (CH, Gly $\alpha$ -C), 58.2 (CH, Pro $\alpha$ -C), 58.5\* (CH, Pro $\alpha$ -C), 59.5 (CH, Pro $\delta$ -C), 59.8\* (CH, Pro $\delta$ -C), 61.0 (CH<sub>2</sub>, OCH<sub>2</sub>CH<sub>3</sub>), 61.9\* (CH<sub>2</sub>, OCH<sub>2</sub>CH<sub>3</sub>), 79.4\* [quat., C(CH<sub>3</sub>)<sub>3</sub>], 79.7 [quat., C(CH<sub>3</sub>)<sub>3</sub>], 117.2\* (CH<sub>2</sub>, =CH<sub>2</sub>), 118.3 (CH<sub>2</sub>, =CH<sub>2</sub>), 118.35 (CH<sub>2</sub>, =CH<sub>2</sub>), 118.7\* (CH<sub>2</sub>, =CH<sub>2</sub>), 132.7\* (CH, C(H)=CH<sub>2</sub>), 133.2 [CH, C(H)=CH<sub>2</sub>], 134.0 [CH, C(H)=CH<sub>2</sub>], 134.7\* [CH, C(H)=CH<sub>2</sub>], 154.7\* (quat., NCO<sub>2</sub>), 155.3 (quat., NCO<sub>2</sub>), 170.5\* (quat., CO), 171.4 (quat., CO), 171.6\* (quat., CO) and 172.1 (quat., CO); *m/z* (FAB+) 381.23896 (MH<sup>+</sup>. C<sub>20</sub>H<sub>33</sub>N<sub>2</sub>O<sub>5</sub> requires 381.23895).

#### ***N*-tert-Butoxycarbonyl-5-allyl-L-proline *tert*-butyl ester **23**<sup>v</sup>**

To a stirred solution of carbamate **22**<sup>vi</sup> (1.14 g, 3.98 mmol) in dry tetrahydrofuran (40 cm<sup>3</sup>) was added a 1 mol L<sup>-1</sup> tetrahydrofuran solution of lithium triethylborohydride (4.78 cm<sup>3</sup>, 4.78 mmol) at -78 °C under atmosphere of nitrogen. The solution was stirred for 1 h, saturated aqueous sodium hydrogen carbonate (10 cm<sup>3</sup>) added and the cooling bath removed. The temperature was allowed to reach 0 °C then 30% aqueous hydrogen peroxide<sup>4</sup> (30 drops) was added and stirring was continued at 0 °C for 30 min. The aqueous layer was extracted with ether and the combined organic extracts were washed with brine, dried (MgSO<sub>4</sub>), filtered and the solvent removed to give the crude aminols (1.17 g). The mixture of crude aminols was dissolved in dry dichloromethane (20 cm<sup>3</sup>) and added dropwise to a stirred solution of trimethylsilyl triflate (1.44 cm<sup>3</sup>, 7.96 mmol) and allyltributylstannane (2.46 cm<sup>3</sup>, 7.96 mmol) in dry dichloromethane (20 cm<sup>3</sup>) at -78 °C under nitrogen. The solution was stirred at -78 °C for 2 h, saturated aqueous sodium hydrogen carbonate (15 cm<sup>3</sup>) was added and the reaction

warmed to room temperature. The aqueous layer was extracted with dichloromethane and the pooled organic extracts dried ( $\text{MgSO}_4$ ) and filtered. Removal of the solvent *in vacuo* gave an oil (3.855 g) that was purified by chromatography ( $\text{SiO}_2$ , 8:1, 7:1, hexane-ethyl acetate; gradient elution) to afford an oil (1.047 g) contaminated with tributylstannane residues. Further chromatography ( $\text{SiO}_2$ , 12:1, 10:1, 8:1, hexanes-ethyl acetate; gradient elution) gave *alkene 23* (0.872 g, 70% over 2 steps) as a colourless oil. Alkene **23** was shown to be a 57:43 mixture of C(2)/C(5) *cis:trans* isomers<sup>#</sup>:  $\delta_{\text{H}}$  (300 MHz;  $\text{CDCl}_3$ ;  $\text{Me}_4\text{Si}$ ) 1.41-1.45 [18H, m, 2 x  $\text{C}(\text{CH}_3)_3$ ], 1.67-2.24 [5H, m,  $\text{Pro}\beta\text{-H}_2$ ,  $\text{Pro}\gamma\text{-H}_2$  and  $\text{CH}_A\text{CH}_B(\text{allyl})$ ], 2.39-2.71 [1H, m,  $\text{CH}_A\text{CH}_B(\text{allyl})$ ], 3.79-4.18 (2H, m,  $\text{Pro}\alpha\text{-H}$  and  $\text{Pro}\delta\text{-H}$ ), 4.99-5.08 (2H, m,  $=\text{CH}_2$ ) and 5.67-5.85 [1H, m,  $\text{C}(\text{H})=\text{CH}_2$ ];  $\delta_{\text{C}}$  (75 MHz;  $\text{CDCl}_3$ ) 26.6 ( $\text{CH}_2$ ,  $\text{Pro}\gamma\text{-C}$ ), 27.4 ( $\text{CH}_2$ ,  $\text{Pro}\gamma\text{-C}$ ), 27.8 ( $\text{CH}_2$ ,  $\text{Pro}\gamma\text{-C}$ ), 27.86 [ $\text{CH}_3$ ,  $\text{C}(\text{CH}_3)_3$ ], 27.92 [ $\text{CH}_3$ ,  $\text{C}(\text{CH}_3)_3$ ], 28.25 [ $\text{CH}_3$ ,  $\text{C}(\text{CH}_3)_3$ ], 28.31 [ $\text{CH}_3$ ,  $\text{C}(\text{CH}_3)_3$ ], 28.4 ( $\text{CH}_2$ ,  $\text{Pro}\beta\text{-C}$ ), 29.4 ( $\text{CH}_2$ ,  $\text{Pro}\beta\text{-C}$ ), 30.2 ( $\text{CH}_2$ ,  $\text{Pro}\beta\text{-C}$ ), 38.1 [ $\text{CH}_2$ ,  $\text{CH}_2(\text{allyl})$ ], 38.5 [ $\text{CH}_2$ ,  $\text{CH}_2(\text{allyl})$ ], 38.98 [ $\text{CH}_2$ ,  $\text{CH}_2(\text{allyl})$ ], 39.1 [ $\text{CH}_2$ ,  $\text{CH}_2(\text{allyl})$ ], 57.4 (CH,  $\text{Pro}\delta\text{-C}$ ), 58.0 (CH,  $\text{Pro}\delta\text{-C}$ ), 60.6 (CH,  $\text{Pro}\alpha\text{-C}$ ), 60.9 (CH,  $\text{Pro}\alpha\text{-C}$ ), 79.5 [quat.,  $\text{C}(\text{CH}_3)_3$ ], 79.6 [quat.,  $\text{C}(\text{CH}_3)_3$ ], 80.7 [quat.,  $\text{C}(\text{CH}_3)_3$ ], 80.74 [quat.,  $\text{C}(\text{CH}_3)_3$ ], 116.9 ( $\text{CH}_2$ ,  $=\text{CH}_2$ ), 116.99 ( $\text{CH}_2$ ,  $=\text{CH}_2$ ), 117.0 ( $\text{CH}_2$ ,  $=\text{CH}_2$ ), 135.12 (CH,  $\text{C}(\text{H})=\text{CH}_2$ ), 135.2 (CH,  $\text{C}(\text{H})=\text{CH}_2$ ), 135.5 (CH,  $\text{C}(\text{H})=\text{CH}_2$ ), 153.7 (quat.,  $\text{NCO}_2$ ), 153.8 (quat.,  $\text{NCO}_2$ ), 154.3 (quat.,  $\text{NCO}_2$ ), 172.1 (quat.,  $\text{Pro}\alpha\text{-CO}$ ), 172.2 (quat.,  $\text{Pro}\alpha\text{-CO}$ ) and 172.3 (quat.,  $\text{Pro}\alpha\text{-CO}$ );  $m/z$  (EI+) 312.2171 ( $\text{M}^+$ .  $\text{C}_{17}\text{H}_{30}\text{NO}_4$  requires 312.2175).

**(1S, 2S)-5-Allylproline *tert*-butyl ester (*trans*) 13b and (1S, 2R) 5-allylproline *tert*-butyl ester (*cis*) 13a.**

To the above mixture of *cis* and *trans* alkenes **23** (0.24 g, 0.77 mmol) was added a 4 mol  $\text{L}^{-1}$  solution of hydrogen chloride in dioxane (4  $\text{cm}^3$ ) at 0 °C. The solution was stirred for 1 h at 0 °C then room temperature for 40 min at which time reaction was complete (by tlc). The mixture was cooled to 0 °C, neutralized with a saturated solution of aqueous sodium hydrogen carbonate and the product extracted with dichloromethane. Removal of the solvent *in vacuo* yielded an oil (0.142 g) which was purified by chromatography ( $\text{SiO}_2$ , 2:1, 5:4, 1:1, hexanes-

<sup>#</sup> Since the two isomers could not be separated, the stereochemistry was determined by  $^1\text{H}$  NMR studies on the separated free amine as described in the next step.

ethyl acetate) to give (i) *amine*<sup>†</sup> **13b** (*trans*) (0.051 g, 31%) as a colourless oil. This compound showed no NOE between the Pro $\alpha$ -H atom at  $\delta$ 3.70 and the Pro $\delta$ -H atom at  $\delta$ 3.26 : [ $\alpha$ ]<sub>D</sub> -31 (*c* 0.47 in CH<sub>2</sub>Cl<sub>2</sub>);  $\delta$ <sub>H</sub> (300 MHz; CDCl<sub>3</sub>; Me<sub>4</sub>Si) 1.35-1.41 (1H, m, Pro $\gamma$ -H<sub>A</sub>H<sub>B</sub>), 1.43 [9H, m, C(CH<sub>3</sub>)<sub>3</sub>], 1.72-1.90 (2H, Pro $\gamma$ -H<sub>A</sub>H<sub>B</sub> and Pro $\beta$  H<sub>A</sub>H<sub>B</sub>), 2.11-2.20 [3H, m, Pro $\beta$  H<sub>A</sub>H<sub>B</sub> and CH<sub>2</sub>(allyl)], 2.47 (1H, s, N-H), 3.26 (1H, p, *J* 6.5, Pro $\delta$ -H), 3.70 (1H, dd, *J* 8.5 and 5.9, Pro $\alpha$ -H), 4.98-5.10 (2H, m, =CH<sub>2</sub>) and 5.73-5.84 [1H, m, C(H)=CH<sub>2</sub>];  $\delta$ <sub>C</sub> (75 MHz; CDCl<sub>3</sub>) 27.9 [CH<sub>3</sub>, C(CH<sub>3</sub>)<sub>3</sub>], 29.5 (CH<sub>2</sub>, Pro $\beta$ -C), 30.7 (CH<sub>2</sub>, Pro $\gamma$ -C), 40.8 [CH<sub>2</sub>, CH<sub>2</sub>(allyl)], 57.6 (CH, Pro $\delta$ -C), 59.7 (CH, Pro $\alpha$ -C), 80.7 [quat., C(CH<sub>3</sub>)<sub>3</sub>], 116.1 (CH<sub>2</sub>, =CH<sub>2</sub>), 136.0 [CH, C(H)=CH<sub>2</sub>], and 174.9 (quat., Pro $\alpha$ -CO); (ii) *amine* **13a** (*cis*) (0.066 g, 41%) as a colourless oil. This compound showed an NOE between the Pro $\alpha$ -H atom at  $\delta$ 3.57-3.62 and the Pro $\delta$ -H atom at  $\delta$ 3.03-3.12: [ $\alpha$ ]<sub>D</sub> -22.1 (*c* 0.66 in CH<sub>2</sub>Cl<sub>2</sub>);  $\delta$ <sub>H</sub> (300 MHz; CDCl<sub>3</sub>; Me<sub>4</sub>Si) 1.24-1.30 (1H, m, Pro $\gamma$ -H<sub>A</sub>H<sub>B</sub>), 1.42 [9H, m, C(CH<sub>3</sub>)<sub>3</sub>], 1.78-1.87 (2H, Pro $\gamma$ -H<sub>A</sub>H<sub>B</sub> and Pro $\beta$ -H<sub>A</sub>H<sub>B</sub>), 1.98-2.07 (1H, m, Pro $\beta$ -H<sub>A</sub>H<sub>B</sub>), 2.18-2.31 [3H, m, CH<sub>2</sub>(allyl) and N-H], 3.03-3.12 (1H, m, Pro $\delta$ -H), 3.57-3.62 (1H, m, Pro $\alpha$ -H), 4.99-5.1 (2H, m, =CH<sub>2</sub>) and 5.72-5.86 [1H, m, C(H)=CH<sub>2</sub>];  $\delta$ <sub>C</sub> (75 MHz; CDCl<sub>3</sub>) 27.9 [CH<sub>3</sub>, C(CH<sub>3</sub>)<sub>3</sub>], 30.4 (CH<sub>2</sub>, Pro $\beta$ -C), 31.1 (CH<sub>2</sub>, Pro $\gamma$ -C), 39.9 [CH<sub>2</sub>, CH<sub>2</sub>(allyl)], 59.1 (CH, Pro $\delta$ -C), 60.5 (CH, Pro $\alpha$ -C), 80.8 [quat., C(CH<sub>3</sub>)], 116.5 (CH<sub>2</sub>, =CH<sub>2</sub>), 135.5 [CH, C(H)=CH<sub>2</sub>], and 174.3 (quat., Pro $\alpha$ -CO); *m/z* (CI<sup>+</sup>) 212.1647 (MH<sup>+</sup>. C<sub>12</sub>H<sub>22</sub>NO<sub>2</sub> requires 212.1651).

### **(2*S*, 5*S*)-*N*-tert-Butoxycarbonyl- $\alpha$ -allylglycine-5-allyl-L-proline tert-butyl ester **11****

*N,N'*-Dicyclohexylcarbodiimide (0.057 g, 0.2761 mmol) was added to a stirred solution of *trans* amine **13b** (0.053 g, 0.251 mmol) and *N*-tert-butoxycarbonyl- $\alpha$ -allylglycine **14** (0.059 g, 0.2761 mmol) in dichloromethane (5 cm<sup>3</sup>) and the mixture stirred overnight, then filtered through Celite™ to remove DCU. The reaction mixture was subsequently washed with saturated aqueous sodium hydrogen carbonate, 2M aqueous hydrochloric acid, dried (MgSO<sub>4</sub>), filtered and the solvent removed to yield an oil (0.106 g) which was purified by chromatography (silica gel, hexane:ethyl acetate, 7:1, 5:1) to afford *diene* **11** (0.083 g, 81%) as a colourless oil: *m/z* (FAB<sup>+</sup>) 409.2707 (MH<sup>+</sup>. C<sub>22</sub>H<sub>37</sub>N<sub>2</sub>O<sub>5</sub> requires 409.2702).

---

<sup>†</sup>Both **13a** and **13b** slowly decompose on exposure to air thus the crude reaction mixture was immediately used for the subsequent coupling step.

**(1S, 2S)-N-Allyl-N-benzyloxycarbonylglycine-5-allylproline *tert*-butyl ester (*trans*) 29 and (1S, 2R)-N-allyl-N-benzyloxycarbonylglycine-5-allylproline *tert*-butyl ester (*cis*) 28.**

To the above mixture of alkenes **13** (0.87 g, 0.77 mmol) was added a 4M solution of hydrogen chloride in dioxane (4 cm<sup>3</sup>) at 0 °C. The solution was stirred for 1 h at 0 °C then room temperature for 35 min after which time reaction was complete (by tlc). The mixture was cooled to 0 °C, neutralized with a saturated solution of aqueous sodium hydrogen carbonate and the product extracted with dichloromethane. Removal of the solvent *in vacuo* yielded an oil (0.568 g) that was dissolved in dichloromethane (30 cm<sup>3</sup>). To this was added triethylamine (0.54 cm<sup>3</sup>, 4.0 mmol), *N*-allyl-*N*-benzyloxycarbonylglycine **27**<sup>vii</sup> (1.0 g, 4.0 mmol) and 1-(3-dimethylaminopropyl)3-ethylcarbodiimide hydrochloride (EDCI) (0.77 g, 4.0 mmol) at 0 °C and the solution stirred for 16 h. The mixture was washed with saturated aqueous sodium hydrogen carbonate, 2 M aqueous hydrochloric acid, dried (MgSO<sub>4</sub>), filtered and the solvent removed to yield an oil (1.7 g) which was purified by chromatography (SiO<sub>2</sub>, 5:1, 4:1, 3:1, 2:1, hexane-ethyl acetate) to afford (i) *diene* **29** (*trans*) (0.29 g, 24%) as a colourless oil. Diene **29** was shown to be a 1:1 *trans:cis* mixture of GlyC(O)-NPro conformers. In addition, restricted rotation about the GlyN-CO carbamate bond was also observed resulting in a 1:1 mixture of conformers: [α]<sub>D</sub> -56.1 (*c* 0.77 in CH<sub>2</sub>Cl<sub>2</sub>); δ<sub>H</sub> (400 MHz; CDCl<sub>3</sub>; Me<sub>4</sub>Si) 1.43 [9H, s, C(CH<sub>3</sub>)<sub>3</sub>], 1.46 [9H, s, C(CH<sub>3</sub>)<sub>3</sub>], 1.48 [9H, s, C(CH<sub>3</sub>)<sub>3</sub>], 1.74-2.71 [6H, m, Proβ-H<sub>2</sub>, Proγ-H<sub>2</sub> and CH<sub>2</sub>(allyl)], 3.54 (0.5H, d, *J* 16.5, Glyα-H<sub>A</sub>H<sub>B</sub>), 3.58 (0.5H, d, *J* 16.5, Glyα-H<sub>A</sub>H<sub>B</sub>), 3.84-4.40 [5H, m, Glyα-H, CH<sub>2</sub>(allyl), Proα-H and Proδ-H], 4.98-5.25 (6H, m, OCH<sub>2</sub>Ph and 2 x =CH<sub>2</sub>), 5.56-5.88 [2H, m, 2 x C(H)=CH<sub>2</sub>] and 7.30-7.37 (5H, m, Ph); δ<sub>C</sub> (100 MHz; CDCl<sub>3</sub>) 25.8 (CH<sub>2</sub>, Proβ-C or Proγ-C), 25.9 (CH<sub>2</sub>, Proβ-C or Proγ-C), 26.16 (CH<sub>2</sub>, Proβ-C or Proγ-C), 26.2 (CH<sub>2</sub>, Proβ-C or Proγ-C), 27.8 [CH<sub>3</sub>, C(CH<sub>3</sub>)<sub>3</sub>], 28.3 (CH<sub>2</sub>, Proβ-C or Proγ-C), 29.3 (CH<sub>2</sub>, Proβ-C or Proγ-C), 29.4 (CH<sub>2</sub>, Proβ-C or Proγ-C), 36.9 [CH<sub>2</sub>, CH<sub>2</sub>(allyl)], 37.0 [CH<sub>2</sub>, CH<sub>2</sub>(allyl)], 39.0 [CH<sub>2</sub>, CH<sub>2</sub>(allyl)], 39.3 [CH<sub>2</sub>, CH<sub>2</sub>(allyl)], 47.4 (CH<sub>2</sub>, Glyα-C), 47.6 (CH<sub>2</sub>, Glyα-C), 47.8 (CH<sub>2</sub>, Glyα-C), 48.1 (CH<sub>2</sub>, Glyα-C), 50.14 [CH<sub>2</sub>, NCH<sub>2</sub>(allyl)], 50.18 [CH<sub>2</sub>, NCH<sub>2</sub>(allyl)], 50.7 [CH<sub>2</sub>, NCH<sub>2</sub>(allyl)], 50.8 [CH<sub>2</sub>, NCH<sub>2</sub>(allyl)], 56.9 (CH, Proδ-C), 57.1 (CH, Proδ-C), 58.2 (CH, Proδ-C), 58.3, (CH, Proδ-C), 60.0 (CH, Proα-C), 60.1 (CH, Proα-C), 60.2 (CH, Proα-C), 60.3 (CH, Proα-C), 67.3 (CH<sub>2</sub>, OCH<sub>2</sub>Ph), 67.4 (CH<sub>2</sub>, OCH<sub>2</sub>Ph), 81.1 [quat., C(CH<sub>3</sub>)<sub>3</sub>], 82.3 [quat., C(CH<sub>3</sub>)<sub>3</sub>], 116.9 (CH<sub>2</sub>, =CH<sub>2</sub>), 117.1 (CH<sub>2</sub>, =CH<sub>2</sub>), 117.2 (CH<sub>2</sub>, =CH<sub>2</sub>), 117.6 (CH<sub>2</sub>, =CH<sub>2</sub>), 117.7 (CH<sub>2</sub>, =CH<sub>2</sub>), 118.1 (CH<sub>2</sub>, =CH<sub>2</sub>), 118.2, (CH<sub>2</sub>, =CH<sub>2</sub>), 127.6 (CH, Ph), 127.8 (CH, Ph), 127.9 (CH, Ph), 128.2 (CH, Ph), 128.3 (CH, Ph), 133.3 [CH, C(H)=CH<sub>2</sub>],

133.4 [CH, C(H)=CH<sub>2</sub>], 133.6 [CH, C(H)=CH<sub>2</sub>], 133.8 [CH, C(H)=CH<sub>2</sub>], 134.9 [CH, C(H)=CH<sub>2</sub>], 135.0 [CH, C(H)=CH<sub>2</sub>], 136.5 (quat., Ph), 156.0 (quat., NCO<sub>2</sub>), 156.37 (quat., NCO<sub>2</sub>), 156.42, (quat., NCO<sub>2</sub>), 167.1 (quat., Gly-CO), 167.3 (quat., Gly-CO), 167.4 (quat., Gly-CO), 167.6 (quat., Gly-CO) and 170.9 (quat., Pro $\alpha$ -CO), 171.0 (quat., Pro $\alpha$ -CO), 171.1 (quat., Pro $\alpha$ -CO); *m/z* (EI+) 442.2455 (M<sup>+</sup>. C<sub>25</sub>H<sub>34</sub>N<sub>2</sub>O<sub>5</sub> requires 442.2468); (ii) a mixture of **28** and **29** (0.044 g, 4%); (iii) *diene 28 (cis)* (0.424 g, 36%) as a colourless oil. Diene **28** was shown to be a 1:1 *trans:cis* mixture of GlyC(O)-NPro conformers. In addition, restricted rotation about the GlyN-CO carbamate bond was also observed resulting in a 1:1 mixture of conformers: [ $\alpha$ ]<sub>D</sub> -39.2 (*c* 0.57 in CH<sub>2</sub>Cl<sub>2</sub>);  $\delta_{\text{H}}$  (400 MHz; CDCl<sub>3</sub>; Me<sub>4</sub>Si) 1.43 [9H, s, C(CH<sub>3</sub>)<sub>3</sub>], 1.45 [9H, s, C(CH<sub>3</sub>)<sub>3</sub>], 1.47 [9H, s, C(CH<sub>3</sub>)<sub>3</sub>], 1.49 [9H, s, C(CH<sub>3</sub>)<sub>3</sub>], 1.69-2.49 [5.75H, m, Pro $\beta$ -H<sub>2</sub>, Pro $\gamma$ -H<sub>2</sub> and CH<sub>2</sub>(allyl)], 2.78-2.84 [0.25H, m, CH<sub>2</sub>(allyl)], 3.61-4.41 [6H, m, Gly $\alpha$ -H<sub>2</sub>, CH<sub>2</sub>(allyl), Pro $\alpha$ -H and Pro $\delta$ -H), 5.02-5.12 (6H, m, OCH<sub>2</sub>Ph and 2 x =CH<sub>2</sub>), 5.67-5.87 [2H, m, 2 x C(H)=CH<sub>2</sub>] and 7.29-7.34 (5H, m, Ph);  $\delta_{\text{C}}$  (100 MHz; CDCl<sub>3</sub>) 26.5 (CH<sub>2</sub>, Pro $\beta$ -C), 27.7 [CH<sub>3</sub>, C(CH<sub>3</sub>)<sub>3</sub>], 27.8 [CH<sub>3</sub>, C(CH<sub>3</sub>)<sub>3</sub>], 27.9 [CH<sub>3</sub>, C(CH<sub>3</sub>)<sub>3</sub>], 29.4 (CH<sub>2</sub>, Pro $\beta$ -C or Pro $\gamma$ -C), 29.6 (CH<sub>2</sub>, Pro $\beta$ -C or Pro $\gamma$ -C), 29.7 (CH<sub>2</sub>, Pro $\beta$ -C or Pro $\gamma$ -C), 37.65 [CH<sub>2</sub>, CH<sub>2</sub>(allyl)], 37.7 [CH<sub>2</sub>, CH<sub>2</sub>(allyl)], 38.9 [CH<sub>2</sub>, CH<sub>2</sub>(allyl)], 47.2 (CH<sub>2</sub>, Gly $\alpha$ -C), 47.6 (CH<sub>2</sub>, Gly $\alpha$ -C), 47.7 (CH<sub>2</sub>, Gly $\alpha$ -C), 48.0 (CH<sub>2</sub>, Gly $\alpha$ -C), 50.2 [CH<sub>2</sub>, NCH<sub>2</sub>(allyl)], 50.3 [CH<sub>2</sub>, NCH<sub>2</sub>(allyl)], 50.8 [CH<sub>2</sub>, NCH<sub>2</sub>(allyl)], 50.9 [CH<sub>2</sub>, NCH<sub>2</sub>(allyl)], 57.8 (CH, Pro $\delta$ -C), 58.5 (CH, Pro $\delta$ -C), 60.2, 60.4 (CH, Pro $\alpha$ -C), 60.5 (CH, Pro $\alpha$ -C), 67.3 (CH<sub>2</sub>, OCH<sub>2</sub>Ph), 67.4 (CH<sub>2</sub>, OCH<sub>2</sub>Ph), 81.0 [quat., C(CH<sub>3</sub>)<sub>3</sub>], 82.2 [quat., C(CH<sub>3</sub>)<sub>3</sub>], 116.9 (CH<sub>2</sub>, =CH<sub>2</sub>), 117.0 (CH<sub>2</sub>, =CH<sub>2</sub>), 117.5 (CH<sub>2</sub>, =CH<sub>2</sub>), 118.0 (CH<sub>2</sub>, =CH<sub>2</sub>), 127.6 (CH, Ph), 127.8 (CH, Ph), 127.9 (CH, Ph), 128.0 (CH, Ph), 128.3 (CH, Ph), 133.3 [CH, C(H)=CH<sub>2</sub>], 133.4 [CH, C(H)=CH<sub>2</sub>], 133.5 [CH, C(H)=CH<sub>2</sub>], 133.6 [CH, C(H)=CH<sub>2</sub>], 134.1 [CH, C(H)=CH<sub>2</sub>], 134.3 [CH, C(H)=CH<sub>2</sub>], 134.8 [CH, C(H)=CH<sub>2</sub>], 134.9 [CH, C(H)=CH<sub>2</sub>], 136.5 (quat., Ph), 155.8 (quat., NCO<sub>2</sub>), 155.9 (quat., NCO<sub>2</sub>), 156.38 (quat., NCO<sub>2</sub>), 156.44 (quat., NCO<sub>2</sub>), 166.95 (quat., Gly-CO), 167.01 (quat., Gly-CO), 167.4 (quat., Gly-CO), 167.5 (quat., Gly-CO), 171.0 (quat., Pro $\alpha$ -CO), 172.2 (quat., Pro $\alpha$ -CO) and 171.3 (quat., Pro $\alpha$ -CO); *m/z* (EI+) 442.2462 (M<sup>+</sup>. C<sub>25</sub>H<sub>34</sub>N<sub>2</sub>O<sub>5</sub> requires 442.2468).

### ***N*-tert-Butyloxy-(*S*)-allylglycyl-(*S*)-allylproline methyl ester<sup>viii</sup> 37**

*N,N'*-Dicyclohexylcarbodiimide (0.1 g, 0.49 mmol) was added to a stirred solution of (*S*)-allylproline methyl ester **36**<sup>ix</sup> (0.1 g, 0.49 mmol), *N*-tert-butoxy-(*S*)-allylglycine **14** (0.12 g, 0.54



mmol), *N*-hydroxybenzotriazole (0.065 g, 0.486 mmol) and triethylamine (0.07 cm<sup>3</sup>, 0.486 mmol) in dichloromethane (10 cm<sup>3</sup>) at 0 °C. The mixture was stirred overnight at room temperature, refrigerated for 2 h and filtered through Celite™ to remove dicyclohexyl urea. The filtrate was washed with saturated aqueous sodium hydrogen carbonate, 2 M aqueous hydrochloric acid, dried (Na<sub>2</sub>SO<sub>4</sub>), filtered and the solvent removed to yield an oil which was purified by chromatography (SiO<sub>2</sub>, 4:1, 3:1, hexane-ethyl acetate) to afford *diene*<sup>2</sup> **4** (0.041 g, *ca.* 23%) as a colourless oil. Diene **37** existed exclusively as the *trans* GlyC(O)-NPro conformer:  $\delta_{\text{H}}$  (400 MHz; CDCl<sub>3</sub>; Me<sub>4</sub>Si) 1.43 [9H, s, C(CH<sub>3</sub>)<sub>3</sub>], 1.94-2.15 (4H, m, Pro $\beta$ -H<sub>2</sub>, Pro $\gamma$ -H<sub>2</sub>), 2.35 [1H, p, *J* 7.1, allyl-*H<sub>A</sub>H<sub>B</sub>*(Pro)], 2.50 [1H, p, *J* 7.2, allyl*H<sub>A</sub>H<sub>B</sub>*(Pro)], 2.62 [1H, dd, *J* 14.0 and 8.4, allyl-*H<sub>A</sub>H<sub>B</sub>*(Gly)], 3.18 [1H, dd, *J* 14.1 and 6.5, allyl-*H<sub>A</sub>H<sub>B</sub>*(Gly)], 3.65-3.80 (5H, m, OCH<sub>3</sub> and Pro $\delta$ -H<sub>2</sub>), 4.46 (1H, dd, *J* 15.4 and 6.7, Gly $\alpha$ -H), 5.08-5.25 (5H, m, 2 x =CH<sub>2</sub> and N-H) and 5.63-5.86 (2H, m, 2 x C(H)=CH<sub>2</sub>);  $\delta_{\text{C}}$  (100 MHz; CDCl<sub>3</sub>) 23.6 (CH<sub>2</sub>, Pro $\gamma$ -C), 28.2 [CH<sub>3</sub>, C(CH<sub>3</sub>)<sub>3</sub>], 35.0 (CH<sub>2</sub>, Pro $\beta$ -C), 36.3 [CH<sub>2</sub>, CH<sub>2</sub>(allyl)Gly], 37.7 [CH<sub>2</sub>, CH<sub>2</sub>(allyl)Pro], 48.5 (CH<sub>2</sub>, Pro $\delta$ -C), 51.6 (CH, Gly $\alpha$ -C), 52.2 (CH<sub>3</sub>, OCH<sub>3</sub>), 68.5 (quat., Pro $\alpha$ -C), 79.6 [quat., C(CH<sub>3</sub>)<sub>3</sub>], 118.5 (CH<sub>2</sub>, =CH<sub>2</sub>), 119.1 (CH<sub>2</sub>, =CH<sub>2</sub>), 132.7 [CH, C(H)=CH<sub>2</sub>], 133.0 [CH, C(H)=CH<sub>2</sub>], 155.4 (quat., NCO<sub>2</sub>), 170.2 (quat., Gly-CO) and 173.7 (quat., Pro-CO).

### **(S)-N-Benzoyloxycarbonylallylglycyl-L-proline 50**

*N,N*-Dicyclohexylcarbodiimide (0.103 g, 0.504 mmol) was added to a solution of *N*-benzyloxycarbonyl-(*S*)-allylglycine **49**<sup>x</sup> (0.114 g, 0.457 mmol), proline methyl ester hydrochloride **48** (0.083 g, 0.504 mmol), *N*-hydroxybenzotriazole (0.068 g, 0.504 mmol) and triethylamine (0.071 cm<sup>3</sup>, 0.504 mmol) in dichloromethane (12 cm<sup>3</sup>) at 0 °C. The mixture was stirred overnight, stored at 0 °C for 3 h and filtered thorough Celite™. The reaction mixture was washed with 2M aqueous hydrochloric acid, saturated sodium hydrogen carbonate solution, dried (MgSO<sub>4</sub>) and the solvent removed to yield an oil which was purified by chromatography (silica gel, hexanes:ethyl acetate, 2:1, 1:1) to afford the *methyl ester of dipeptide 50* (0.141 g) that was suspended in dioxane (4 cm<sup>3</sup>). 1M Aqueous sodium hydroxide (1.95 cm<sup>3</sup>, 1.95 mmol) was added and the mixture stirred at room temperature for 24 h. Water (5 cm<sup>3</sup>) was added and the mixture extracted with dichloromethane. The aqueous layer was acidified with 31% hydrochloric acid and the product extracted with dichloromethane. The organic layers were pooled, washed with brine, dried (MgSO<sub>4</sub>) and the solvent removed to afford an oil (0.152 g) that was purified by chromatography (silica gel, hexane:ethyl acetate, 3:1, then hexane:ethyl

acetate:acetic acid, 3:1:0.4, 2:1:0.3) to give *acid* **50** (0.102 g, 64%) as a colourless oil. Acid **50** was shown to be a 87:13 *trans:cis* mixture of conformers by <sup>1</sup>H NMR analysis (the ratio was estimated by integration of multiplets at δ 3.33-3.50 and 3.62-3.77 assigned to the Proδ-H<sub>2</sub> atoms of the minor and major conformers respectively): [α]<sub>D</sub> -91 (c 0.26 in CH<sub>2</sub>Cl<sub>2</sub>); δ<sub>H</sub> (300 MHz; CDCl<sub>3</sub>; Me<sub>4</sub>Si) 1.65\* (0.13H, br s, Proβ-H<sub>A</sub>H<sub>B</sub>), 1.84-2.25 (3.87H, m, Proβ-H<sub>A</sub>H<sub>B</sub>, \* Proβ-H<sub>2</sub>, Proγ-H<sub>2</sub>), 2.34-2.53 [2H, m, CH<sub>2</sub>(allyl)], 3.33-3.50\* (0.26H, m, Proδ-H<sub>2</sub>), 3.62-3.77 (1.74H, m, Proδ-H<sub>2</sub>), 4.30-4.58 (2H, m, Proα-H, Glyα-H), 4.93-5.15 (4H, m, OCH<sub>2</sub>Ph, =CH<sub>2</sub>) 5.71-5.85 (1H, m, C(H)=CH<sub>2</sub>), 6.0 (0.13H, br d, *J* 8.5, N-H), 6.06\* (0.13H, br d, *J* 8.7, N-H), 7.26-7.31 (5H, m, Ph) and 8.01 (1H, br s, OH); δ<sub>C</sub> (75 MHz; CDCl<sub>3</sub>) 22.1\* (CH<sub>2</sub>, Proγ-C), 24.8 (CH<sub>2</sub>, Proγ-C), 28.6 (CH<sub>2</sub>, Proβ-C), 31.2\* (CH<sub>2</sub>, Proβ-C), 36.6 [CH<sub>2</sub>, CH<sub>2</sub>(allyl)], 37.8\* [CH<sub>2</sub>, CH<sub>2</sub>(allyl)], 46.7\* (CH<sub>2</sub>, Proδ-C), 47.3 (CH<sub>2</sub>, Proδ-C), 52.1 (CH, Glyα-C), 52.3\* (CH, Glyα-C), 59.2 (CH, Proα-C), 66.6 (CH<sub>2</sub>, OCH<sub>2</sub>Ph), 67.1\* (CH<sub>2</sub>, OCH<sub>2</sub>Ph), 119.1 (CH<sub>2</sub>, =CH<sub>2</sub>), 127.9, 128.0, 128.4, 128.5 (CH, Ph), 132.4 (CH, C(H)=CH<sub>2</sub>), 136.1\* (quat., Ph), 136.3 (quat., Ph), 156.1 (quat., NCO<sub>2</sub>), 170.8\* (quat., Glyα-CO), 171.4 (quat., Glyα-CO) and 174.6 (quat., Proα-CO); *m/z* (EI<sup>+</sup>) 346.1527 (M<sup>+</sup>. C<sub>18</sub>H<sub>22</sub>N<sub>2</sub>O<sub>5</sub> requires 346.1529).

#### **(S)-N-Benzyloxycarbonylallylglycyl-L-prolyl-L-γ-(R)-allylglutamic acid dibenzyl ester 52**

To an ice cold solution of acid **50** (0.134 g, 0.387 mmol) and triethylamine (0.062 cm<sup>3</sup>, 0.461 mmol) in dichloromethane (10 cm<sup>3</sup>) was added dropwise ethyl chloroformate (0.045 cm<sup>3</sup>, 0.464 mmol). The solution was stirred at 0 °C for 40 min then an ice cold solution of trifluoroacetate **51** [prepared by treatment of the Boc derivative<sup>xi</sup> (0.217 g, 0.464 mmol) and triethylamine (0.062cm<sup>3</sup>, 0.464 mmol) in dichloromethane (5 cm<sup>3</sup>) was added dropwise and the mixture stirred overnight. The solution was subsequently washed with 2M aqueous hydrochloric acid, saturated sodium hydrogen carbonate solution, dried (MgSO<sub>4</sub>) and the solvent removed to yield an oil which was purified by chromatography (silica gel, hexane:ethyl acetate, 2:1) to give *protected tripeptide* **52** (0.162 g, 60%) as a colourless oil. Tripeptide **52** was shown to be a 89:11 *trans:cis* mixture of conformers by <sup>1</sup>H NMR analysis (the ratio was estimated by

integration of the doubles at  $\delta$  8.04 and 7.10 assigned to the GluN-H atoms of the minor and major conformers respectively):  $[\alpha]_D$  -31.2 ( $c$  0.462 in  $\text{CH}_2\text{Cl}_2$ );  $\delta_H$  (400 MHz;  $\text{CDCl}_3$ ;  $\text{Me}_4\text{Si}$ ) 1.90-1.99 (2H, m,  $\text{Pro}\beta\text{-H}_A\text{H}_B$ ,  $\text{Pro}\gamma\text{-H}_A\text{H}_B$ ), 2.06-2.13 (3H, m,  $\text{Pro}\gamma\text{-H}_A\text{H}_B$ ,  $\text{Glu}\beta\text{-H}_2$ ), 2.19-2.26 (1H, m,  $\text{Pro}\beta\text{-H}_A\text{H}_B$ ), 2.33-2.42 [3H, m,  $\text{CH}_2(\text{allyl})$ ,  $\text{CH}_A\text{CH}_B(\text{allyl})$ ], 2.47-2.54 (1H, m,  $\text{CH}_A\text{CH}_B(\text{allyl})$ ), 2.63 (1H, p,  $J$  6.7,  $\text{Glu}\gamma\text{-H}$ ), 3.56-3.72 (2H, m,  $\text{Pro}\delta\text{-H}_2$ ), 4.18\* (0.11H, q,  $J$  6.2,  $\text{Gly}\alpha\text{-H}$ ), 4.38\* (0.11H, d,  $J$  7.7,  $\text{Pro}\alpha\text{-H}$ ), 4.54-4.66 (2.78H,  $\text{Gly}\alpha\text{-H}$ ,  $\text{Pro}\alpha\text{-H}$ ),  $\text{Glu}\alpha\text{-H}$ ), 4.86-5.18 (10H, m, 3 x  $\text{OCH}_2\text{Ph}$ , 2 x  $=\text{CH}_2$ ), 5.60-5.81 (3H, m, 2 x  $\text{C}(\text{H})=\text{CH}_2$ ,  $\text{GlyN-H}$ ), 7.10 (0.89H, d,  $J$  7.4,  $\text{GluN-H}$ ), 7.26-7.39 (15H, m, Ph) and 7.10\* (0.11H, d,  $J$  7.9,  $\text{GluN-H}$ );  $\delta_C$  (100 MHz;  $\text{CDCl}_3$ ) 22.0\* ( $\text{CH}_2$ ,  $\text{Pro}\gamma\text{-C}$ ), 24.9 ( $\text{CH}_2$ ,  $\text{Pro}\gamma\text{-C}$ ), 27.5 ( $\text{CH}_2$ ,  $\text{Pro}\beta\text{-C}$ ), 31.3\* ( $\text{CH}_2$ ,  $\text{Pro}\beta\text{-C}$ ), 31.4\* ( $\text{CH}_2$ ,  $\text{Glu}\beta\text{-C}$ ), 32.9 ( $\text{CH}_2$ ,  $\text{Glu}\beta\text{-C}$ ), 35.65\* [ $\text{CH}_2$ ,  $\text{CH}_2(\text{allyl})$ ], 35.71\* [ $\text{CH}_2$ ,  $\text{CH}_2(\text{allyl})$ ], 35.9 [ $\text{CH}_2$ ,  $\text{CH}_2(\text{allyl})$ ], 36.9 [ $\text{CH}_2$ ,  $\text{CH}_2(\text{allyl})$ ], 41.0 (CH,  $\text{Glu}\gamma\text{-C}$ ), 41.9\* (CH,  $\text{Glu}\gamma\text{-C}$ ), 46.9\* ( $\text{CH}_2$ ,  $\text{Pro}\delta\text{-C}$ ), 47.3 ( $\text{CH}_2$ ,  $\text{Pro}\delta\text{-C}$ ), 50.7 (CH,  $\text{Glu}\alpha\text{-C}$ ), 51.3\* (CH,  $\text{Glu}\alpha\text{-C}$ ), 51.8 (CH,  $\text{Gly}\alpha\text{-C}$ ), 52.4\* (CH,  $\text{Gly}\alpha\text{-C}$ ), 59.9 (CH,  $\text{Pro}\alpha\text{-C}$ ), 60.8\* (CH,  $\text{Pro}\alpha\text{-C}$ ), 66.31\* ( $\text{CH}_2$ ,  $\text{OCH}_2\text{Ph}$ ), 66.4 ( $\text{CH}_2$ ,  $\text{OCH}_2\text{Ph}$ ), 66.8 ( $\text{CH}_2$ ,  $\text{OCH}_2\text{Ph}$ ), 67.0\* ( $\text{CH}_2$ ,  $\text{OCH}_2\text{Ph}$ ), 67.2 ( $\text{CH}_2$ ,  $\text{OCH}_2\text{Ph}$ ), 117.7, 119.0, 119.8\* ( $\text{CH}_2$ ,  $=\text{CH}_2$ ), 127.9, 128.0, 128.14, 128.22, 128.24, 128.31, 128.42, 128.46, (CH, Ph), 131.7,\* 132.2, 134.2 (CH,  $\text{C}(\text{H})=\text{CH}_2$ ), 135.2, 135.3,\* 135.7, 136.0,\* 136.2 (quat., Ph), 155.8 (quat.,  $\text{NCO}_2$ ), 156.2\* (quat.,  $\text{NCO}_2$ ), 170.7\* (quat., CO), 170.9 (quat., CO) 171.2 (quat., CO), 171.5 (quat., CO), 171.6\* (quat., CO), 174.3\* (quat.,  $\text{Glu}\gamma\text{-CO}$ ) and 174.4 (quat.,  $\text{Glu}\gamma\text{-CO}$ );  $m/z$  (EI+) 695.3170 ( $\text{M}^+$ .  $\text{C}_{40}\text{H}_{45}\text{N}_3\text{O}_8$  requires 695.3207).

#### ***N*-Allyl-*N*-benzyloxycarbonylglycyl-*L*-proline methyl ester **54****

1-(3-Dimethylaminopropyl)-3-ethylcarbodiimide hydrochloride (EDCI) (0.453 g, 2.36 mmol) was added to a solution of proline methyl ester hydrochloride **48** (0.356 g, 2.15 mmol), acid **55** (0.590 mmol, 2.35 mmol) and triethylamine (0.481 g, 4.73 mmol) in dichloromethane (20  $\text{cm}^3$ ) at 0 °C. The resultant solution was stirred for 19 h, washed with 2M aqueous hydrochloric acid

and saturated aqueous sodium hydrogen carbonate, dried (MgSO<sub>4</sub>) and the solvent removed to yield an oil which was purified by chromatography (silica gel, hexanes:ethyl acetate, 2:1, 1:1) to afford *protected dipeptide 54* (0.508 g, 66%) as a colourless oil. Dipeptide **54** was shown to be a 76:24 *trans:cis* mixture of conformers by <sup>13</sup>C NMR analysis (the ratio was estimated by integration of signals at δ 22.0 and 24.5, 24.7, assigned to the Proγ-C atoms of the minor and major conformers respectively). In addition, restricted rotation about the GlyN-CO carbamate bond was also observed resulting in a further 1:1 mixture of conformers: [α]<sub>D</sub> -54.6 (*c* 1.17 in CH<sub>2</sub>Cl<sub>2</sub>); δ<sub>H</sub> (400 MHz; CDCl<sub>3</sub>; Me<sub>4</sub>Si) 1.81-2.14 (4H, m, Proβ-H<sub>2</sub>, Proγ-H<sub>2</sub>), 3.29-3.58 (2H, m, Proδ-H<sub>2</sub>), 3.64, 3.66, 3.69\* (3H, s, OCH<sub>3</sub>), 3.84-4.20 [4H, m, CH<sub>2</sub>(allyl), Glyα-H<sub>2</sub>], 4.40-4.48 (1H, m, Proα-H), 5.07-5.17 (4H, m, OCH<sub>2</sub>Ph, =CH<sub>2</sub>), 5.69-5.81 (1H, m, C(H)=CH<sub>2</sub>) and 7.24-7.30 (m, 5H, Ph); δ<sub>C</sub> (100 MHz; CDCl<sub>3</sub>) 22.0\* (CH<sub>2</sub>, Proγ-C), 24.62, 24.73 (CH<sub>2</sub>, Proγ-C), 28.66, 28.73 (CH<sub>2</sub>, Proβ-C), 31.1,\* 31.3\* (CH<sub>2</sub>, Proβ-C), 45.93, 45.98 (CH<sub>2</sub>, Proδ-C), 46.5\* (CH<sub>2</sub>, Proδ-C), 47.5, 48.0 (CH<sub>2</sub>, Glyα-C), 50.0, 50.6 [CH<sub>2</sub>, CH<sub>2</sub>(allyl)], 50.0,\* 50.6\* [CH<sub>2</sub>, CH<sub>2</sub>(allyl)], 52.0, (CH<sub>3</sub>, OCH<sub>3</sub>), 52.31,\* 52.5\* (CH<sub>3</sub>, OCH<sub>3</sub>), 58.4,\* 58.5\* (CH, Proα-C), 58.8 (CH, Proα-C), 67.2, 67.3 (CH<sub>2</sub>, OCH<sub>2</sub>Ph), 117.0, 117.5 (CH<sub>2</sub>, =CH<sub>2</sub>), 127.5, 127.7, 127.8, 128.3, (CH, Ph), 133.2, 133.4 (CH, C(H)=CH<sub>2</sub>) 136.4, 136.5 (quat., Ph), 155.8, 156.3, (quat., NCO<sub>2</sub>), 167.1 (quat., Gly-CO), 167.4,\* 167.5\* (quat., Gly-CO). 172.0,\* 172.2\* (quat., Pro-CO) and 172.3, 172.4 (quat., Pro-CO); *m/z* (EI<sup>+</sup>) 360.1676 (M<sup>+</sup>. C<sub>19</sub>H<sub>24</sub>N<sub>2</sub>O<sub>5</sub> requires 360.1685).

### ***N*-Allyl-*N*-benzyloxycarbonylglycyl-L-proline **55****

To a solution of protected dipeptide **54** (0.474 g, 1.31 mmol) in dioxane (13 cm<sup>3</sup>) was added 1M aqueous sodium hydroxide (6.71 cm<sup>3</sup>, 6.71 mmol) and the mixture stirred at room temperature for 20 h. Water (10 cm<sup>3</sup>) was added and the mixture extracted with dichloromethane. The aqueous layer was acidified with 10% HCl and the product extracted with dichloromethane. The organic layers were pooled, dried (MgSO<sub>4</sub>) and the solvent removed to afford an oil (0.456 g) contaminated with 2-hydroxy-1,4-dioxane. Subsequent purification by chromatography (silica gel, hexanes:ethyl acetate, 1:1, 1:2, 1:3,) gave *acid 55* (0.250 g, 55%) as a colourless oil: Acid **55** was shown to be a 86:14 *trans:cis* mixture of conformers by <sup>13</sup>C NMR analysis (the ratio was estimated by integration of signals at δ 22.1

and 24.6, 24.7, assigned to the Pro $\gamma$ -C atoms of the minor and major conformers respectively). In addition, restricted rotation about the GlyN-CO carbamate bond was also observed resulting in a further 1:1 mixture of conformers  $[\alpha]_D$  -117 (*c* 0.8 in CH<sub>2</sub>Cl<sub>2</sub>);  $\delta_H$  (300 MHz; CDCl<sub>3</sub>; Me<sub>4</sub>Si) 1.88-2.25 (4H, m, Pro $\beta$ -H<sub>2</sub>, Pro $\gamma$ -H<sub>2</sub>), 3.30-3.69 (2H, m, Pro $\delta$ -H<sub>2</sub>), 3.75-4.26 [4H, m, CH<sub>2</sub>(allyl), Gly $\alpha$ -H<sub>2</sub>], 4.50-4.58 (1H, m, Pro $\alpha$ -H), 5.10-5.22 (4H, m, OCH<sub>2</sub>Ph, =CH<sub>2</sub>), 5.73-5.82 (1H, m, C(H)=CH<sub>2</sub>), 7.33-7.34 (m, 5H, Ph) and 7.84 (1H, br s, OH);  $\delta_C$  (75 MHz; CDCl<sub>3</sub>) 22.1\* (CH<sub>2</sub>, Pro $\gamma$ -C), 24.6, 24.7 (CH<sub>2</sub>, Pro $\gamma$ -C), 27.9, 28.0 (CH<sub>2</sub>, Pro $\beta$ -C), 31.1, 31.3\* (CH<sub>2</sub>, Pro $\beta$ -C), 46.5 (CH<sub>2</sub>, Pro $\delta$ -C), 46.7\* (CH<sub>2</sub>, Pro $\delta$ -C), 47.5, 48.1 (CH<sub>2</sub>, Gly $\alpha$ -C), 47.7, 48.2\* (CH<sub>2</sub>, Gly $\alpha$ -C), 50.2, 50.7 [CH<sub>2</sub>, CH<sub>2</sub>(allyl)], 50.5, 50.9\* [CH<sub>2</sub>, CH<sub>2</sub>(allyl)], 58.6\* (CH, Pro $\alpha$ -C), 59.5 (CH, Pro $\alpha$ -C), 67.6 (CH<sub>2</sub>, OCH<sub>2</sub>Ph), 117.3, 117.9 (CH<sub>2</sub>, =CH<sub>2</sub>), 127.6, 127.9, 128.0, 128.4, (CH, Ph), 133.0, 133.2 (CH, C(H)=CH<sub>2</sub>) 136.3 (quat., Ph), 155.9, 156.5, (quat., NCO<sub>2</sub>), 156.7\* (quat., NCO<sub>2</sub>), 167.8\* (quat., Gly-CO), 168.9, 169.0 (quat., Gly-CO), 173.6, 173.7 (quat., Pro-CO) and 174.4\* (quat., Pro-CO); *m/z* (EI<sup>+</sup>) 346.1524 (M<sup>+</sup>. C<sub>18</sub>H<sub>22</sub>N<sub>2</sub>O<sub>5</sub> requires 346.1529).

#### ***N*-Allyl-*N*-benzyloxycarbonylglycyl-L-prolyl-L- $\gamma$ (*R*)-allylglutamic acid dibenzyl ester **56****

To an ice cold solution of acid **55** (0.288 g, 0.655 mmol) and triethylamine (0.150 cm<sup>3</sup>, 0.80 mmol) was added dropwise ethyl chloroformate (0.075 cm<sup>3</sup>, 0.786 mmol). The solution was stirred at 0 °C for 40 min then an ice-cold solution of *trifluoroacetate* **51** (0.359 g, 0.768 mmol) and triethylamine (0.150 cm<sup>3</sup>, 0.80 mmol) in dichloromethane (15 cm<sup>3</sup>) was added dropwise and the mixture stirred overnight. The solution was subsequently washed with 2M aqueous hydrochloric acid, saturated aqueous sodium hydrogen carbonate, dried (MgSO<sub>4</sub>) and the solvent removed to yield an oil which was purified by chromatography (silica gel, hexane:ethyl acetate, 1:1) to give *fully protected tripeptide* **56** (0.432 g, 94%) as a colourless oil. Tripeptide **56** was shown to be a 85:15 *trans:cis* mixture of conformers by <sup>13</sup>C NMR analysis (the ratio was estimated by integration of signals at  $\delta$  22.1 and 24.9 assigned to the Pro $\gamma$ -C atoms of the minor and major conformers respectively). In addition, restricted rotation about the GlyN-CO carbamate bond was also observed resulting in a further 1:1 mixture of conformers:  $[\alpha]_D$  -38.7 (*c* 0.73 in CH<sub>2</sub>Cl<sub>2</sub>);  $\delta_H$  (300 MHz; CDCl<sub>3</sub>; Me<sub>4</sub>Si) 1.75-2.33 [8H, m, Pro $\beta$ -H<sub>2</sub>, Pro $\gamma$ -H<sub>2</sub>, Glu $\beta$ -H<sub>2</sub>, CH<sub>2</sub>(allyl)], 2.55-2.66 (1H, m, Glu $\gamma$ -H), 3.25-3.63 (m, 2H, Pro $\delta$ -H<sub>2</sub>), 3.77-4.19 [4H, m, Gly $\alpha$ -H<sub>2</sub>, CH<sub>2</sub>(allyl)], 4.32\* (0.15H, d, *J* 7.7, Pro $\alpha$ -H), 4.46-4.60 (1.85H, m, Pro $\alpha$ -H, Glu $\alpha$ -H),

4.99-5.15 (10H, m, 3 x OCH<sub>2</sub>Ph, 2 x =CH<sub>2</sub>), 5.57-5.82 (2H, m, 2 x C(H)=CH<sub>2</sub>) and 7.19-7.34 (16H, m, 3 x Ph, GluN-H);  $\delta_C$  (75 MHz; CDCl<sub>3</sub>) 22.2\* (CH<sub>2</sub>, Pro $\gamma$ -C), 24.9 (CH<sub>2</sub>, Pro $\gamma$ -C), 27.2\* (CH<sub>2</sub>, Pro $\beta$ -C), 27.5 (CH<sub>2</sub>, Pro $\beta$ -C), 31.8\* [CH<sub>2</sub>, CH<sub>2</sub>(allyl)], 32.7 [CH<sub>2</sub>, CH<sub>2</sub>(allyl)], 35.9 (CH<sub>2</sub>, Glu $\beta$ -C), 36.0\* (CH<sub>2</sub>, Glu $\beta$ -C), 41.2 (CH, Glu $\gamma$ -C), 41.9\* (CH, Glu $\gamma$ -C), 46.4 (CH<sub>2</sub>, Pro $\delta$ -C), 46.9\* (CH<sub>2</sub>, Pro $\delta$ -C), 47.6,\* (CH<sub>2</sub>, Gly $\alpha$ -C), 48.3 (CH<sub>2</sub>, Gly $\alpha$ -C), 48.2,\* (CH<sub>2</sub>, Gly $\alpha$ -C), 50.4 [CH<sub>2</sub>, CH<sub>2</sub>(allyl)], 50.7, 50.9 (CH<sub>2</sub>, Glu $\alpha$ -C), 51.2,\* [CH<sub>2</sub>, CH<sub>2</sub>(allyl)], 51.4\* (CH<sub>2</sub>, Glu $\alpha$ -C), 59.96\* (CH, Pro $\alpha$ -C), 60.0 (CH, Pro $\alpha$ -C), 60.4\* (CH, Pro $\alpha$ -C), 66.3 (CH<sub>2</sub>, OCH<sub>2</sub>Ph), 66.4\* (CH<sub>2</sub>, OCH<sub>2</sub>Ph), 66.5\* (CH<sub>2</sub>, OCH<sub>2</sub>Ph), 67.0 (CH<sub>2</sub>, OCH<sub>2</sub>Ph), 67.1\* (CH<sub>2</sub>, OCH<sub>2</sub>Ph), 67.35 (CH<sub>2</sub>, OCH<sub>2</sub>Ph), 67.4 (CH<sub>2</sub>, OCH<sub>2</sub>Ph), 117.0 (CH<sub>2</sub>, =CH<sub>2</sub>), 117.1\* (CH<sub>2</sub>, =CH<sub>2</sub>), 117.5 (CH<sub>2</sub>, =CH<sub>2</sub>), 117.6 (CH<sub>2</sub>, =CH<sub>2</sub>), 117.8\* (CH<sub>2</sub>, =CH<sub>2</sub>) 118.0\* (CH<sub>2</sub>, =CH<sub>2</sub>), 127.56,\* 127.63,\* 127.77,\* 127.85,\* 128.08, 128.13, 128.17, 128.35, 128.39, 128.43 (CH, Ph), 133.3 (CH, C(H)=CH<sub>2</sub>), 133.5\* (CH, C(H)=CH<sub>2</sub>), 134.0\* (CH, C(H)=CH<sub>2</sub>), 134.2\* (CH, C(H)=CH<sub>2</sub>), 134.3 (CH, C(H)=CH<sub>2</sub>), 135.2\* (quat., Ph), 135.3 (quat., Ph), 135.7 (quat., Ph),, 136.4 (quat., Ph), 136.6\* (quat., Ph), 155.9\* (quat., NCO<sub>2</sub>), 156.5, (quat., NCO<sub>2</sub>), 168.4 (quat., Gly-CO), 170.9,\* 171.0, 171.4, 171.8\* (quat., Pro-CON, Glu $\alpha$ -CO), 174.3\* (quat., Glu $\gamma$ -CO) and 174.4 (quat., Glu $\gamma$ -CO); *m/z* (FAB+) 696.3280 (MH<sup>+</sup>. C<sub>40</sub>H<sub>46</sub>N<sub>3</sub>O<sub>8</sub> requires 696.3285).

## References

- i J. Rahul, *Org. Prep. Proceed. Int.*, 2001, **33**, 405.
- ii J. Mulzer, F. Schulzchen and J-W. Bats, *Tetrahedron*, 2000, **56**, 4289.
- iii (a) Y. N. Belokon, V. I. Taraov, V. L. Maleev, T. F. Savel'eva and M. G. Ryzhov, *Tetrahedron: Asymmetry*, 1998, **9**, 4249; (b) S. Collet, P. Bauchat, R. Danion-Bougot and D. Danion, *Tetrahedron: Asymmetry*, 1998, **9**, 2121.
- iv Y. Gao, P. Lane-Belland J. C. Vederas, *J. Org. Chem.*, 1998, **63**, 2133.
- v M. V. Chiesa, L. Manzoni and C. Scolastico, *Synlett*, 1996, 441.
- vi R. August, J. A. Khan, C. M. Moody and D. W. Young, *J. Chem. Soc. Perkin Trans 1*, 1996, **6**, 507.
- vii J. F. Reichwein and R. M. J. Liskamp, *Eur. J. Org. Chem.*, 2000, 2335.
- viii T. Hoffmann, H. Laing, R. Waibel and P. Gmeiner, *Angew. Chem.* 2001, **40**, 3361.
- ix (a) D. Seebach, M. Boes, R. Naef and W. B Schweizer, *J. Am. Chem. Soc.*, 1983, **105**, 5390;  
(b) H. Wang and J. P. Germanas, *Synlett*, 1999, 33.

x Z.-Y. Sun, C.-H. Kwon and J. N. D. Wurpel, *J. Med. Chem.*, 1994, **37**, 2841.

xi The Boc derivative of trifluoroacetate **51** was prepared from dibenzyl (*S*)-glutamate following a similar procedure to that reported for  $\gamma$ -allylation of dimethyl (*S*)-glutamate see: S. Hanessian and R. Margarita, *Tetrahedron Lett.*, 1998, **39**, 5887.
